# Supplementary material for: Experimental investigation of uranium release from spent nuclear fuels under conditions expected in a deep geological repository
Source: Copernicus journal article supplement (doi:10.5194/sand-2-149-2023), 2023-09-06
Supplement: Supplementary file 1 [file sand-2-149-2023-supplement.pdf]

Supplement of Saf. Nucl. Waste Disposal, 2, 149–150, 2023  
<https://doi.org/10.5194/sand-2-149-2023-supplement>  
© Author(s) 2023. CC BY 4.0 License.

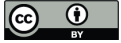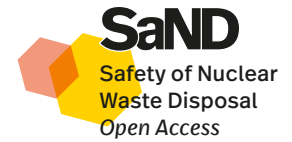

*Supplement of*

## **Experimental investigation of uranium release from spent nuclear fuels under conditions expected in a deep geological repository**

**Michel Herm et al.**

*Correspondence to:* Michel Herm ([michel.herm@kit.edu](mailto:michel.herm@kit.edu))

The copyright of individual parts of the supplement might differ from the article licence.



# Experimental investigation of uranium release from spent nuclear fuels under conditions expected in a deep geological repository

Michel Herm, Arndt Walschburger, Tobias König, Volker Metz, Horst Geckeis

Karlsruhe Institute of Technology, Institute for Nuclear Waste Disposal, P.O. Box 3640, 76021 Karlsruhe, Germany

## BACKGROUND AND OBJECTIVES

- Long-term management of highly radioactive waste in Germany foresees direct disposal of spent nuclear fuel (SNF) in a deep underground repository.
- Water access, consecutive failure of canisters and loss of fuel cladding integrity considered in long-term safety analyses of such facilities.
- Assessing performance of SNF in geological disposal systems requires process understanding of SNF dissolution and rates as well as the quantification of radionuclides release from SNF under reducing conditions of a breached container.

### Release of radionuclides from SNF can be grouped into two stages:

- (1) instantaneous release (IRF) due to waste package and cladding failure e.g. fission gases (Kr, Xe), volatile/long-lived elements (I, Cs, Cl) present in **gap** and **grain boundaries**.
- (2) long-term release as result of dissolution of **SNF matrix** e.g. actinides (Pu, Np), lanthanides, segregated oxides (Rb, Tc) and metallic precipitates (Ru, Pd, Tc).

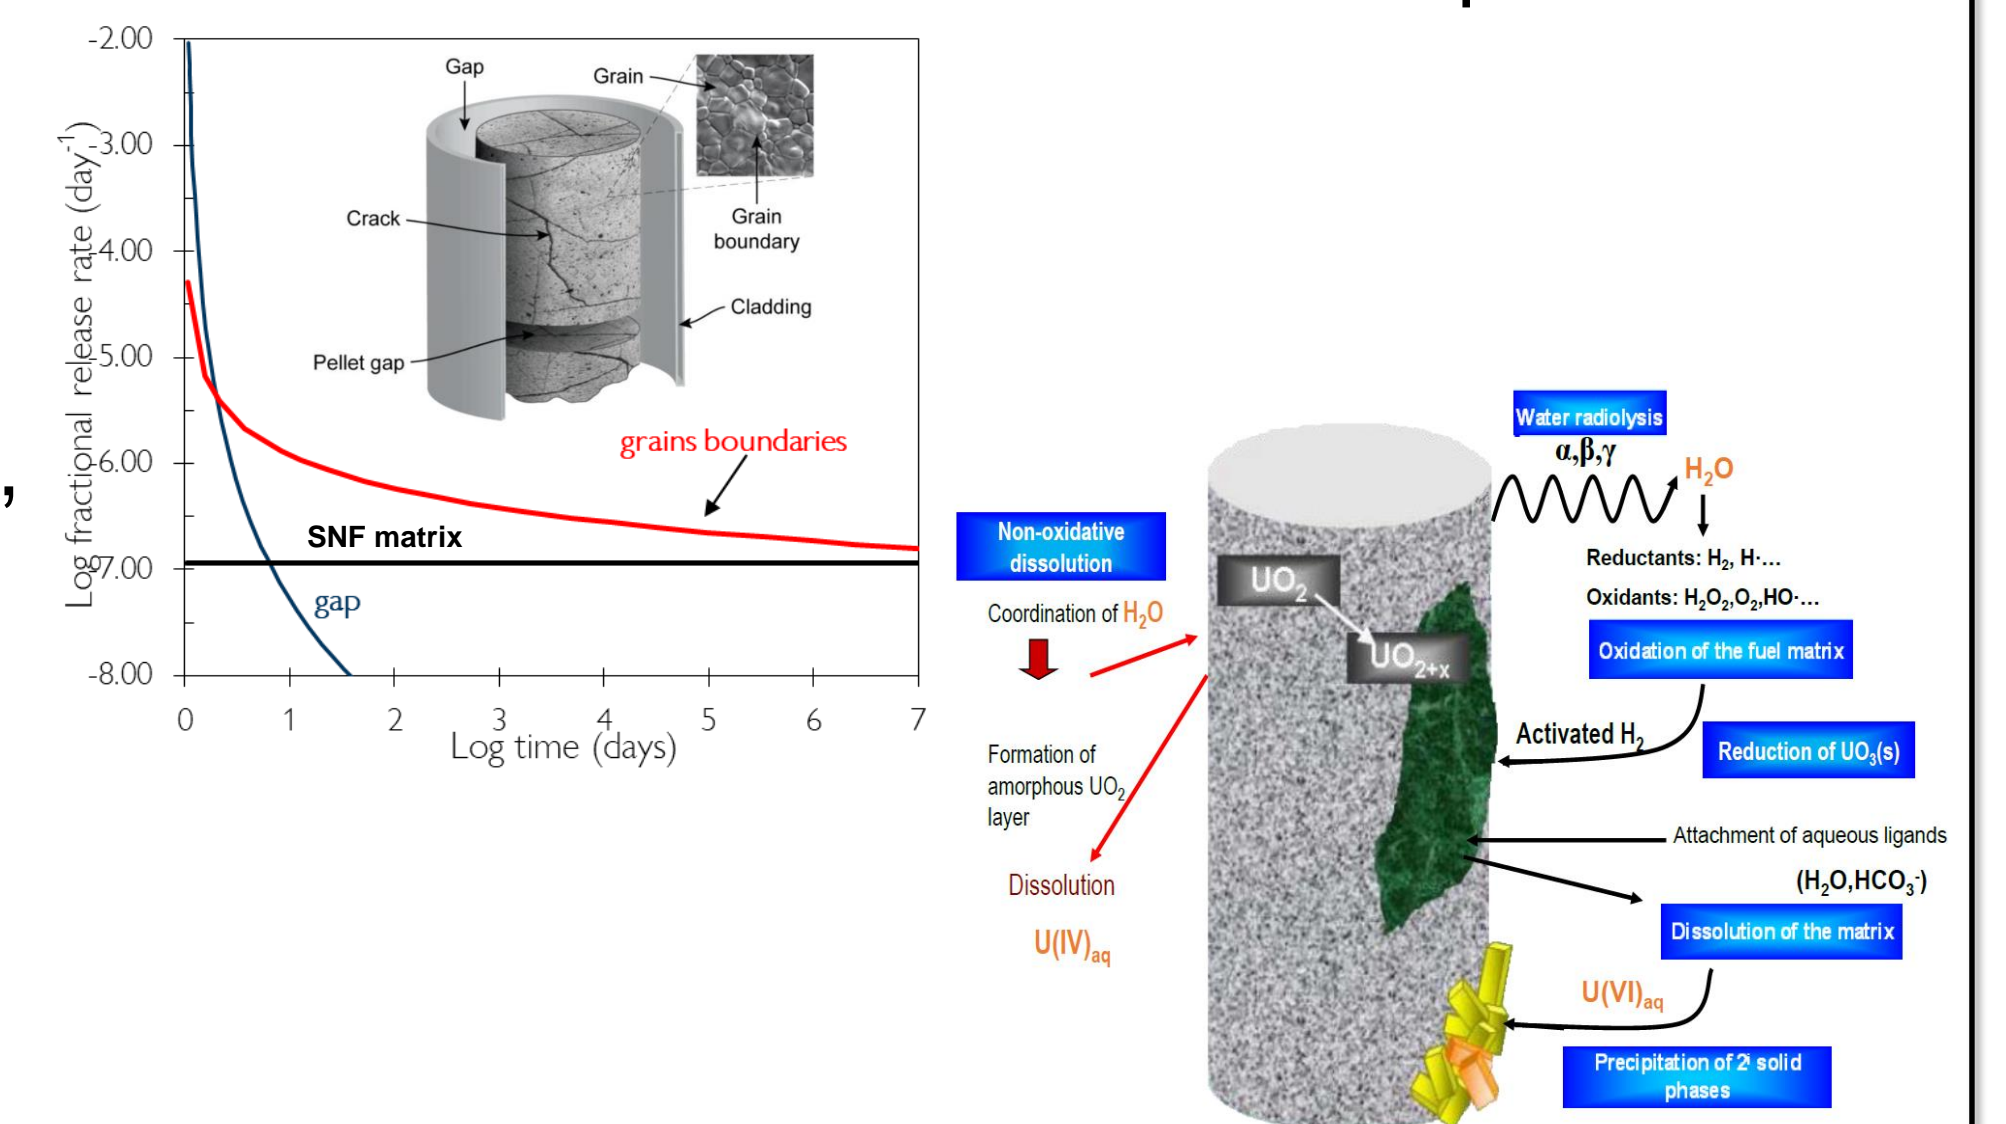

### Objectives:

- Since most radionuclides produced during irradiation are trapped within the SNF matrix, understanding of the processes leading to the dissolution of the matrix and its dissolution rates are of particular interest for post-closure safety assessments.
- Behavior of SNF is studied under geochemical conditions representative of various repository concepts and SNF dissolution mechanisms are derived.

## MATERIALS AND METHODS

### SNF characteristics:

- Reactors: PWR Gösgen (CH) and PWR Obrigheim (D).
- Type of fuel: UO<sub>2</sub> and MOX.
- Average burn-up: 38 & 50.4 GWd/t<sub>HM</sub>.

### Preparation of SNF samples:

- Samples cut by low speed saw (no cooling liquid).
- Segments with cladding and fragments without cladding.

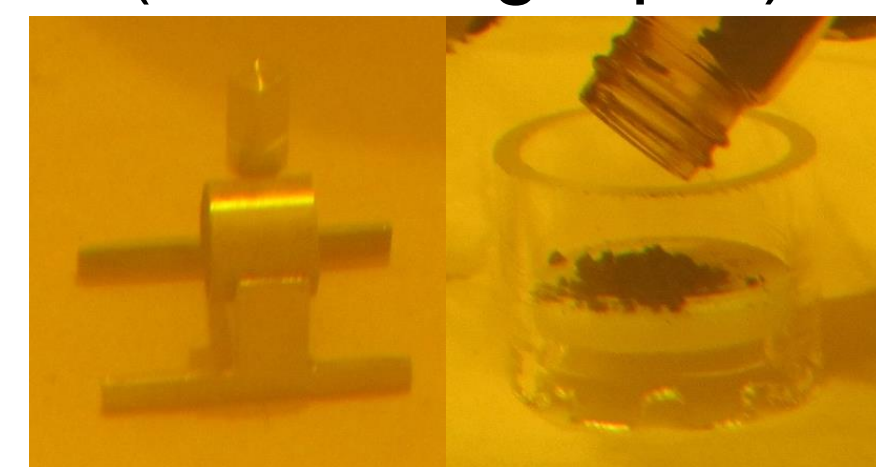

### Leaching experiments:

- Ar or Ar/H<sub>2</sub> atmospheres.
- salt brines, granitic/bentonitic groundwater, cementitious groundwater.

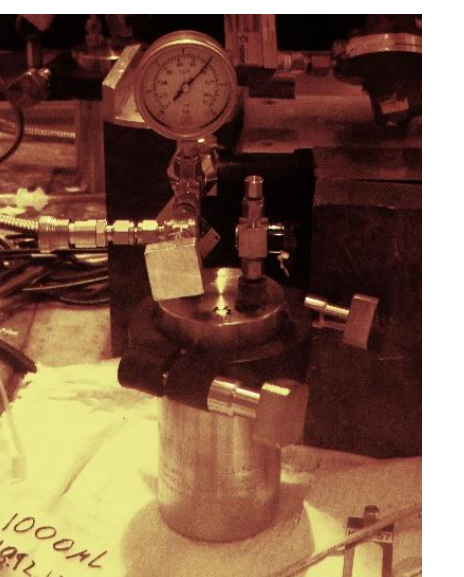

## RESULTS

### Uranium release to solution in molar concentration:

- Large scatter of [U] in initial stages of experiments.
- [U] approaches towards solubility limit of U(IV) after > 1 year independent of type of studied SNF (UO<sub>2</sub>, MOX, segments or fragments).
- Similar behavior observed for other redox-sensitive elements (not shown).

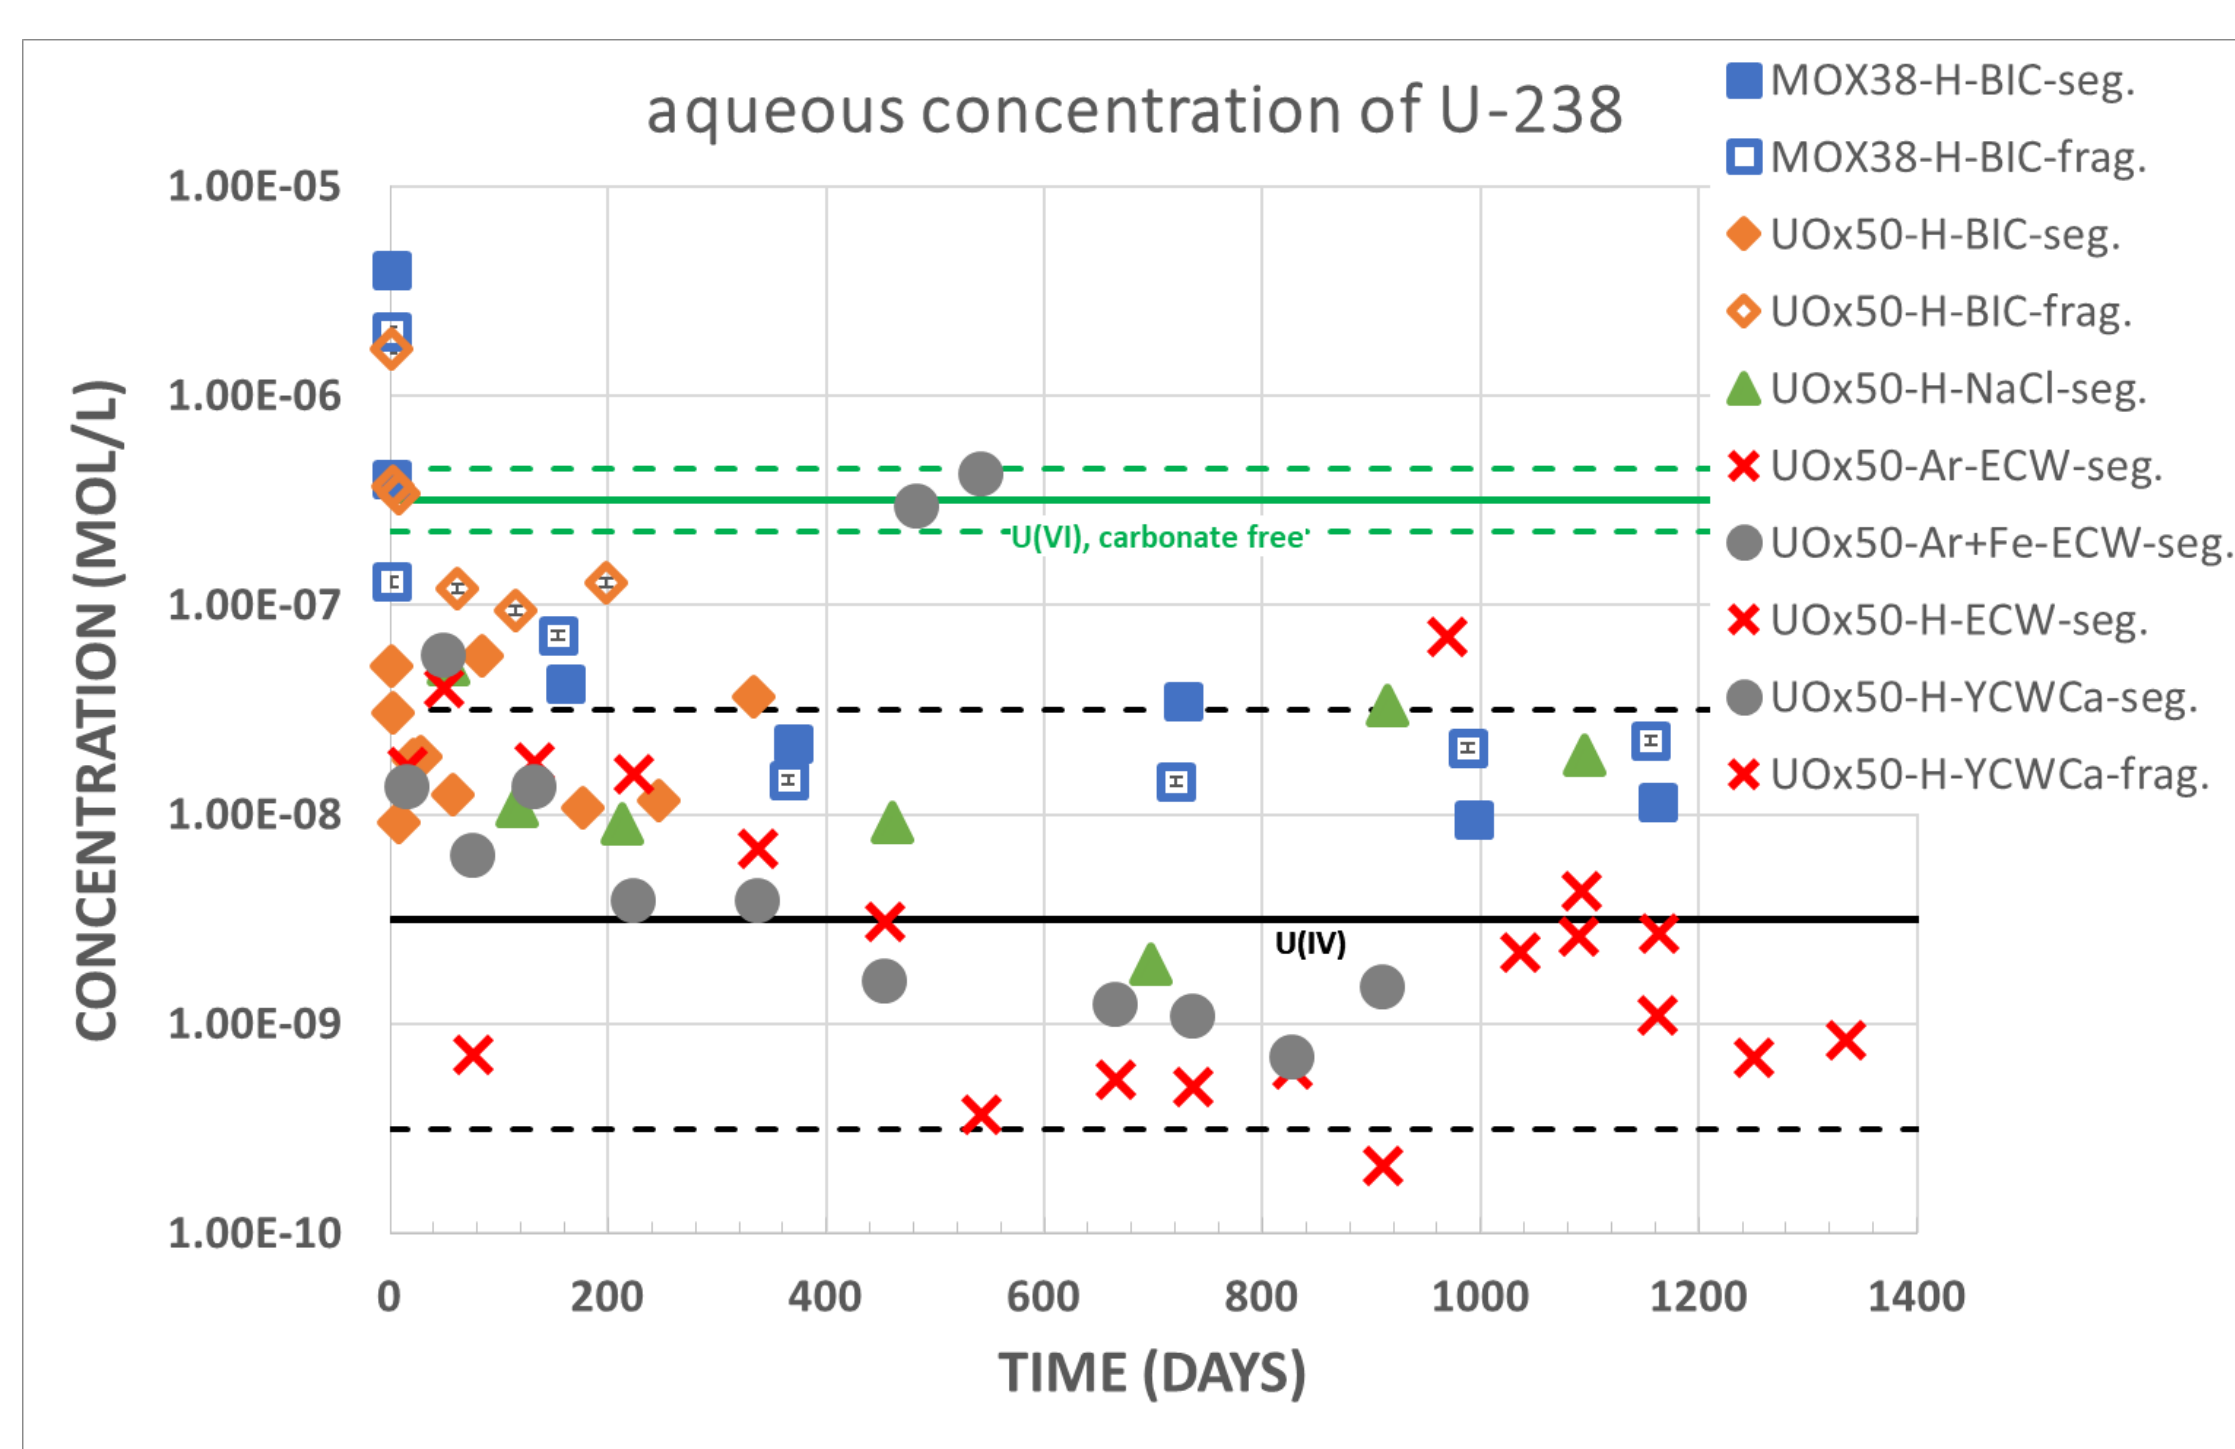

### Rates of uranium release to solution:

- Release rate of uranium decreases significantly in all experiments within first 400 days of leaching and seems to be constant within scatter between 1·10<sup>-11</sup> and 1·10<sup>-9</sup> per day.
- Although rate is very low, it is > 0 and continuous release is observed.
- In long-term safety assessments a fractional radionuclide release rate of 10<sup>-7</sup> per year is often used (≈ 3·10<sup>-10</sup> to 2·10<sup>-9</sup> per day).

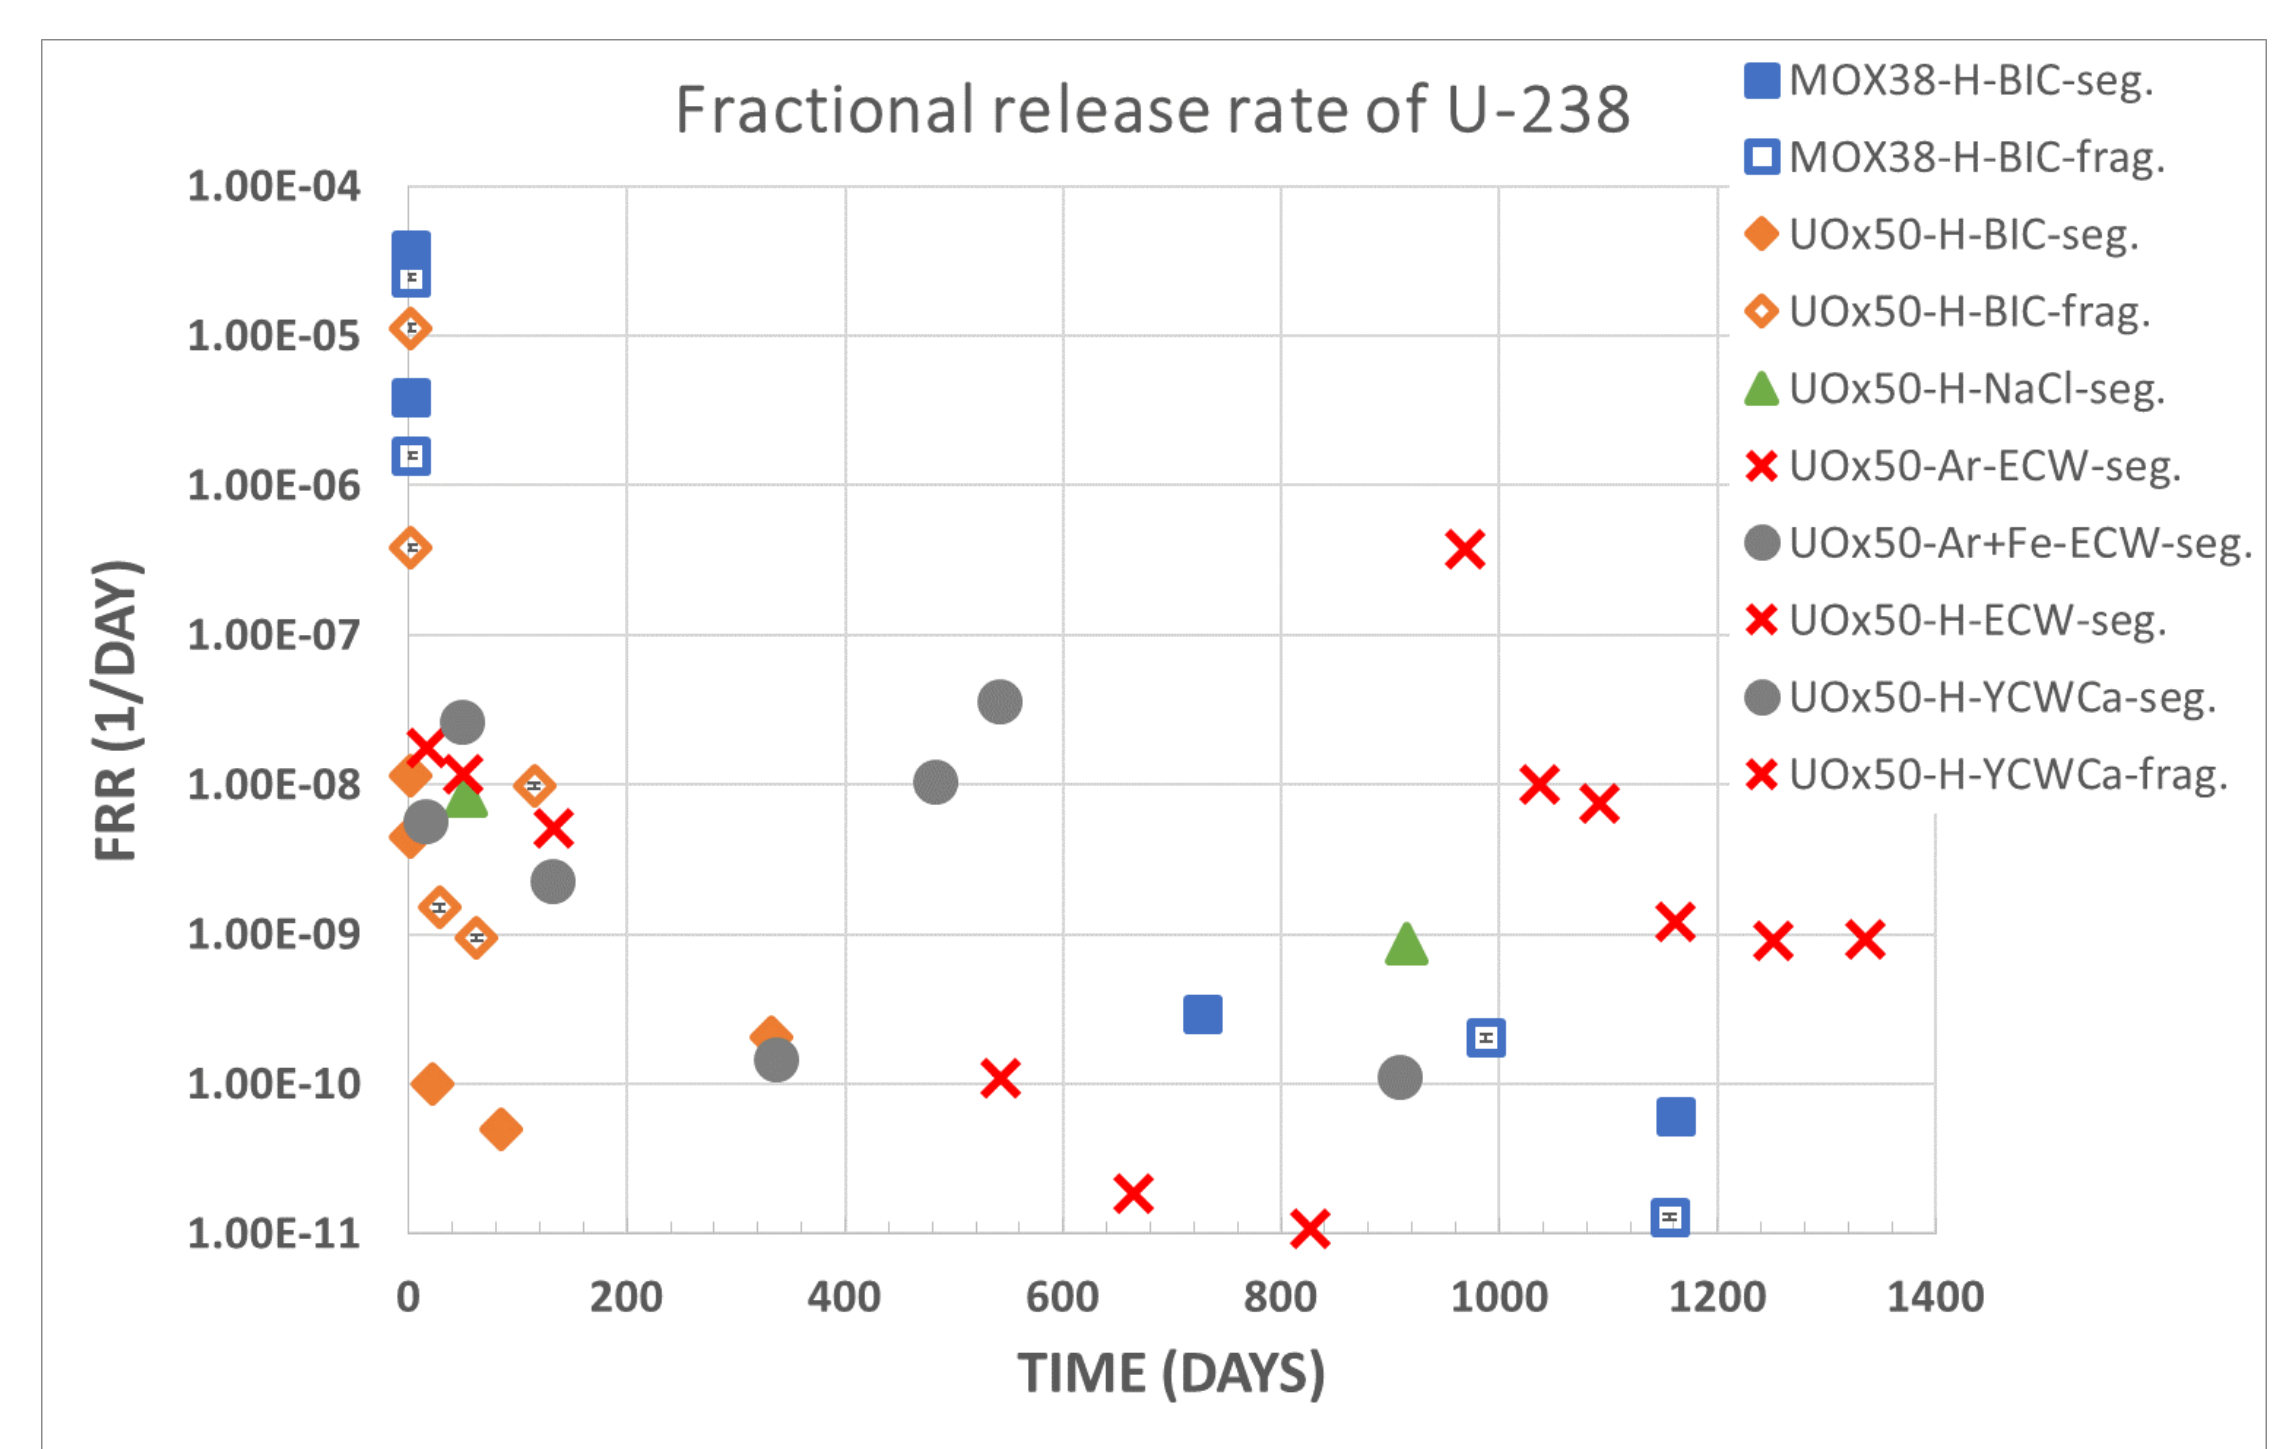

## SUMMARY AND CONCLUSIONS

- Comparison of results from SNF experiments under various redox conditions demonstrate that oxidative matrix dissolution is inhibited due to presence of hydrogen.
- No significant difference in matrix dissolution of investigated spent UO<sub>2</sub> and MOX fuels.
- Composition and pH of simple, synthetic groundwater plays minor role in matrix dissolution.

## References

- Ewing, R. C.: Long-term storage of spent nuclear fuel, *Nature Materials*, 14, 252–257, doi:10.1038/nmat4226, 2015.
- Pastina, B.: An alternative conceptual model for the spent nuclear fuel-water interaction in deep geological disposal conditions, *Appl. Sci.*, 11, doi.org/10.3390/app11188566, 2021.

### Acknowledgments

The authors would like to thank our (former) colleagues at KIT-INE, in particular to E. Bohnert, E. González-Robles, B. Grambow, L. Iglesias, M. Kelm, B. Kienzler, A. Loida, N. Müller, M. Plaschke, for their significant contributions to the research on spent nuclear fuel behavior at KIT-INE. Further, SFS (5th EC FP), NF-Pro (6th EC FP), FIRST-Nuclides (7th EC FP), DISCO (EC H2020) and ONDRAF-NIRAS are acknowledged for funding.
